# Supplementary material for: A Tissue Systems Pathology Assay for High-Risk Barrett's Esophagus
Source: Oxford University Press journal article supplement (doi:10.1158/1055-9965.epi-15-1164), 2016-05-14
Supplement: 10559965epi151164-sup-157586_1_supp_3344462_y23dmq.docx [file 10559965epi151164-sup-157586_1_supp_3344462_y23dmq.docx]

**Supplementary Material**

**Supplementary Tables**

| **Table S1. Summary of Progression Endpoints in Incident Progressor Patients** | | | | | | | | | | | | |
| --- | --- | --- | --- | --- | --- | --- | --- | --- | --- | --- | --- | --- |
|  | **Training Set** | | | | | | **Independent Validation Set** | | | | | |
| **# Incident Progressor Patients** (all four institutions combined) | 41 | | | | | | 38 | | | | | |
| **# Incident Progressor Patients in each Diagnostic Class** | ND | | IND | | LGD | | ND | | IND | | LGD | |
| 26 | | 1 | | 14 | | 31 | | 2 | | 5 | |
| **Progression Endpoint**  (HGD or EAC) | 19 HGD  7 EAC | | 1 HGD  0 EAC | | 13 HGD  1 EAC | | 22 HGD  9 EAC | | 2 HGD  0 EAC | | 5 HGD  0 EAC | |
|  | | | | | | | | | | | | |
| **# Incident Progressor Patients** (each institution) | AMC | Geisinger | | UPenn | | UPitt | AMC | Geisinger | | UPenn | | UPitt |
| 25 | 9 | | 1 | | 6 | 28 | 4 | | 3 | | 3 |
| **Progression Endpoint**  (HGD or EAC) | 19 HGD  6 EAC* | 8 HGD  1 EAC | | 1 HGD  0 EAC | | 5 HGD  1 EAC | 22 HGD  6 EAC* | 2 HGD  2 EAC | | 3 HGD  0 EAC | | 2 HGD  1 EAC |
| *early stage esophageal adenocarcinomas | | | | | | | | | | | | |

| **Table S2. Correlation Among Quantitative Image Analysis Features Derived from the Same Candidate Biomarkers** | | | | | |
| --- | --- | --- | --- | --- | --- |
| **Feature** | **p53 nuclear sum intensity** | **p53 nuclear mean intensity** | **p53 mean intensity in nuclei clusters** | **p16 cytoplasm mean intensity** | **Nuclear area in p53+ p16- cells** |
| **p53 nuclear sum intensity** |  | -0.60 | -0.60 | 0.07 | -0.24 |
| **p53 nuclear mean intensity** | -0.60 |  | 0.82 | 0.09 | 0.02 |
| **p53 mean intensity in nuclei clusters** | -0.60 | 0.82 |  | 0.14 | 0.13 |
| **p16 cytoplasm mean intensity** | 0.07 | 0.09 | 0.14 |  | 0.19 |
| **Nuclear area in p53+ p16- cells** | -0.24 | 0.02 | 0.13 | 0.19 |  |

| **Table S3. Comparison of Predictive Performance of Risk Classes Predicted by Test vs. Clinical Variables in Training Set of BE Patients** | | |
| --- | --- | --- |
| **A. Prognostic Performance of Risk Classes vs. Clinical Variables*** | | |
| **Variable** | **Multivariate Hazard Ratio (95% CI)** | **P Value** |
| **Analysis *without* Risk Prediction Test** |  |  |
| General Pathologist's Dx(LGD vs. ND/IND) | 2.17 (1.05 - 4.47) | 0.04 |
| BE segment length (Long vs. Short) | 1.09 (0.55 - 2.19) | 0.8 |
| Age | 1.03 (0.99 - 1.06) | 0.12 |
| Gender | 0.85 (0.37 - 1.97) | 0.71 |
| p53 (% cells overexpressing) | 4.23 (0.09 - 202.5) | 0.46 |
|  |  |  |
| **Analysis *with* Risk Prediction Test** |  |  |
| General Pathologist's Dx(LGD vs. ND/IND) | 1.57 (0.74 - 3.37) | 0.24 |
| BE segment length (Long vs. Short) | 1 (0.49 - 2.03) | 1 |
| Age | 1.05 (1.02 - 1.09) | 0.002 |
| Gender | 1.74 (0.68 - 4.46) | 0.25 |
| p53 (% cells overexpressingⱡ) | 0.05 (0 - 4.18) | 0.19 |
| Risk Classes (predicted by test) |  |  |
| *Intermediate Risk vs. Low Risk* | 8.08 (2.65 - 24.65) | 0.0002 |
| *High Risk vs. Low Risk* | 33.02 (11.8 - 92.44) | <0.0001 |
| **B. Prognostic Performance of of Risk Classes vs GI Subspecialist Diagnosis**** | | |
| **Variable** | **Multivariate Hazard Ratio (95% CI)** | **P Value** |
| **Analysis *without* Risk Prediction Test** |  |  |
| GI Subspecialist Pathologist's Dx(LGD vs. ND/IND) | 6.8 (3.54 - 13.06) | <0.0001 |
|  |  |  |
| **Analysis *with* Risk Prediction Test** |  |  |
| GI Subspecialist Pathologist's Dx(LGD vs. ND/IND) | 3.25 (1.57 - 6.75) | 0.002 |
| Risk Classes (predicted by test) |  |  |
| *Intermediate Risk vs. Low Risk* | 4.64 (1.67 - 12.87) | 0.003 |
| *High Risk vs. Low Risk* | 10.98 (4.67 - 25.81) | <0.0001 |
| Multivariate Cox models were run in which progression to HGD/EAC was evaluated first in relation to clinical variables alone, then in relation to risk classes predicted by the test and clinical variables in non-progressor patients and incident progressor patients. The following clinical variables were dichotomized: pathologist diagnosis (LGD vs. ND or IND), gender (0 for F, 1 for M), BE segment length (0 for short (≤3cm), 1 for long (>3cm) and Risk Classes (high vs. low risk and intermediate vs. low risk). Age and p53 were evaluated as continuous variables. *n=35 incident progressor patients and n=116 non-progressor patients with complete data for all evaluated variables. **n=41 incident progressor patients and n=142 non-progressor patients (all training set patients) for analysis in part B. ⱡ calculated by the image analysis software as described in Methods (percentage of cells with nuclei p53 mean intensity >95 on a scale of 0-1023 in the 10 bit tissue images). | | |

| **Table S4. Comparison of Predictive Performance of Risk Score as a Continuous Variable vs. Clinical Variables in Training Set** | | |
| --- | --- | --- |
| **A. Multivariate Cox Analysis of Risk Score vs. Clinical Variables*** | | |
| **Variable** | **Hazard Ratio (95% CI)** | **P Value** |
| **Analysis *without* Risk Score** |  |  |
| General Pathologist's Dx (LGD vs. ND/IND) | 2.17 (1.05 - 4.47) | 0.04 |
| BE segment length (Long vs. Short) | 1.09 (0.55 - 2.19) | 0.8 |
| Age | 1.03 (0.99 - 1.06) | 0.12 |
| Gender | 0.85 (0.37 - 1.97) | 0.71 |
| p53 (% cells overexpressing) | 4.23 (0.09 - 202.5) | 0.46 |
|  |  |  |
| **Analysis *with* Risk Score** |  |  |
| General Pathologist's Dx(LGD vs. ND/IND) | 1.59 (0.73 - 3.47) | 0.25 |
| BE segment length (Long vs. Short) | 0.88 (0.42 - 1.82) | 0.73 |
| Age | 1.05 (1.02 - 1.09) | 0.003 |
| Gender | 1.53 (0.6 - 3.91) | 0.38 |
| p53 (% cells overexpressing) | 0.01 (0 - 1.66) | 0.08 |
| Continuous Risk Score | 1.94 (1.61 - 2.35) | <0.0001 |
| **B. Multivariate Cox Analysis of Risk Score vs GI Subspecialist Diagnosis**** | | |
| **Variable** | **Hazard Ratio (95% CI)** | **P Value** |
| **Analysis *without* Risk Score** |  |  |
| GI Subspecialist Pathologist's Dx (LGD vs. ND/IND) | 6.8 (3.54 - 13.06) | <0.0001 |
|  |  |  |
| **Analysis *with* Risk Score** |  |  |
| GI Subspecialist Pathologist's Dx (LGD vs. ND/IND) | 2.12 (0.94 - 4.79) | 0.07 |
| Continuous Risk Score | 1.59 (1.35 - 1.89) | <0.0001 |
| Multivariate Cox models were run in which progression to HGD/EAC was evaluated first in relation to clinical variables alone, then in relation to Risk Score as a continuous variable and clinical variables in non-progressor patients and incident progressor patients. The following clinical variables were dichotomized: pathologist diagnosis (LGD vs ND or IND), sex (0 for F, 1 for M), BE segment length (0 for short (≤3cm), 1 for long (>3cm). Age, p53 and Risk Score were evaluated as continuous variables. *n=35 incident progressor patients and n=116 non-progressor patients with complete data for all evaluated variables. **n=41 incident progressor patients and n=142 non-progressor patients (all training set patients) for analysis in part B. | | |

| **Table S5. Comparison of Predictive Performance of Risk Score as a Continuous Variable vs. Clinical Variables in Validation Set** | | |
| --- | --- | --- |
| **A. Multivariate Cox Analysis of Risk Score vs. Clinical Variables*** | | |
| **Variable** | **Hazard Ratio (95% CI)** | **P Value** |
| **Analysis *without* Risk Score** |  |  |
| General Pathologist's Dx (LGD vs. ND/ IND) | 1.55 (0.67 - 3.58) | 0.31 |
| Barrett's segment length (Long vs. Short) | 2.53 (1 - 6.42) | 0.05 |
| Age | 0.99 (0.96 - 1.02) | 0.38 |
| Gender | 1.47 (0.51 - 4.29) | 0.48 |
| p53 (% cells overexpressing) | 6.87 (0.01 - 4755.13) | 0.56 |
|  |  |  |
| **Analysis *with* Risk Score** |  |  |
| General Pathologist's Dx (LGD vs. ND/IND) | 1.41 (0.6 - 3.33) | 0.44 |
| Barrett's segment length (Long vs. Short) | 1.86 (0.73 - 4.73) | 0.19 |
| Age | 1 (0.97 - 1.03) | 0.94 |
| Gender | 0.9 (0.3 - 2.73) | 0.86 |
| p53 (% cells overexpressing) | 0.05 (0 - 83.69) | 0.42 |
| Continuous Risk Score | 1.65 (1.35 - 2.03) | <0.0001 |
| **B. Multivariate Cox Analysis of Risk Score vs GI Subspecialist**** | | |
| **Variable** | **Hazard Ratio (95% CI)** | **P Value** |
| **Analysis *without* Risk Score** |  |  |
| GI Subspecialist Pathologist's Dx (LGD vs. ND/IND) | 3.19 (1.24 - 8.2) | 0.02 |
|  |  |  |
| **Analysis *with* Risk Score** |  |  |
| GI Subspecialist Pathologist's Dx (LGD vs. ND/IND) | 1.35 (0.5 - 3.64) | 0.55 |
| Continuous Risk Score | 1.71 (1.44 - 2.04) | <0.0001 |
| Multivariate Cox models were run in which progression to HGD/EAC was evaluated first in relation to clinical variables alone, then in relation to Risk Score and clinical variables in non-progressor patients and incident progressor patients. The following clinical variables were dichotomized: pathologist diagnosis (LGD vs. ND or IND), gender (0 for F, 1 for M), BE segment length (0 for short (≤3cm), 1 for long (>3cm) and Risk Score. Age, p53 and Risk Score were evaluated as continuous variables. *n=30 incident progressor patients and n=103 non-progressor patients with complete data for all evaluated variables. **n=38 incident progressor patients and n=145 non-progressor patients (all validation set patients) for analysis in part B. | | |

**Supplementary Figures**

**Figure S1.** **Flowchart of Steps to Train and Validate 3-Tier 15-Feature/Measure Classifier for Risk Prediction in Barrett’s Esophagus Biopsies.**

**
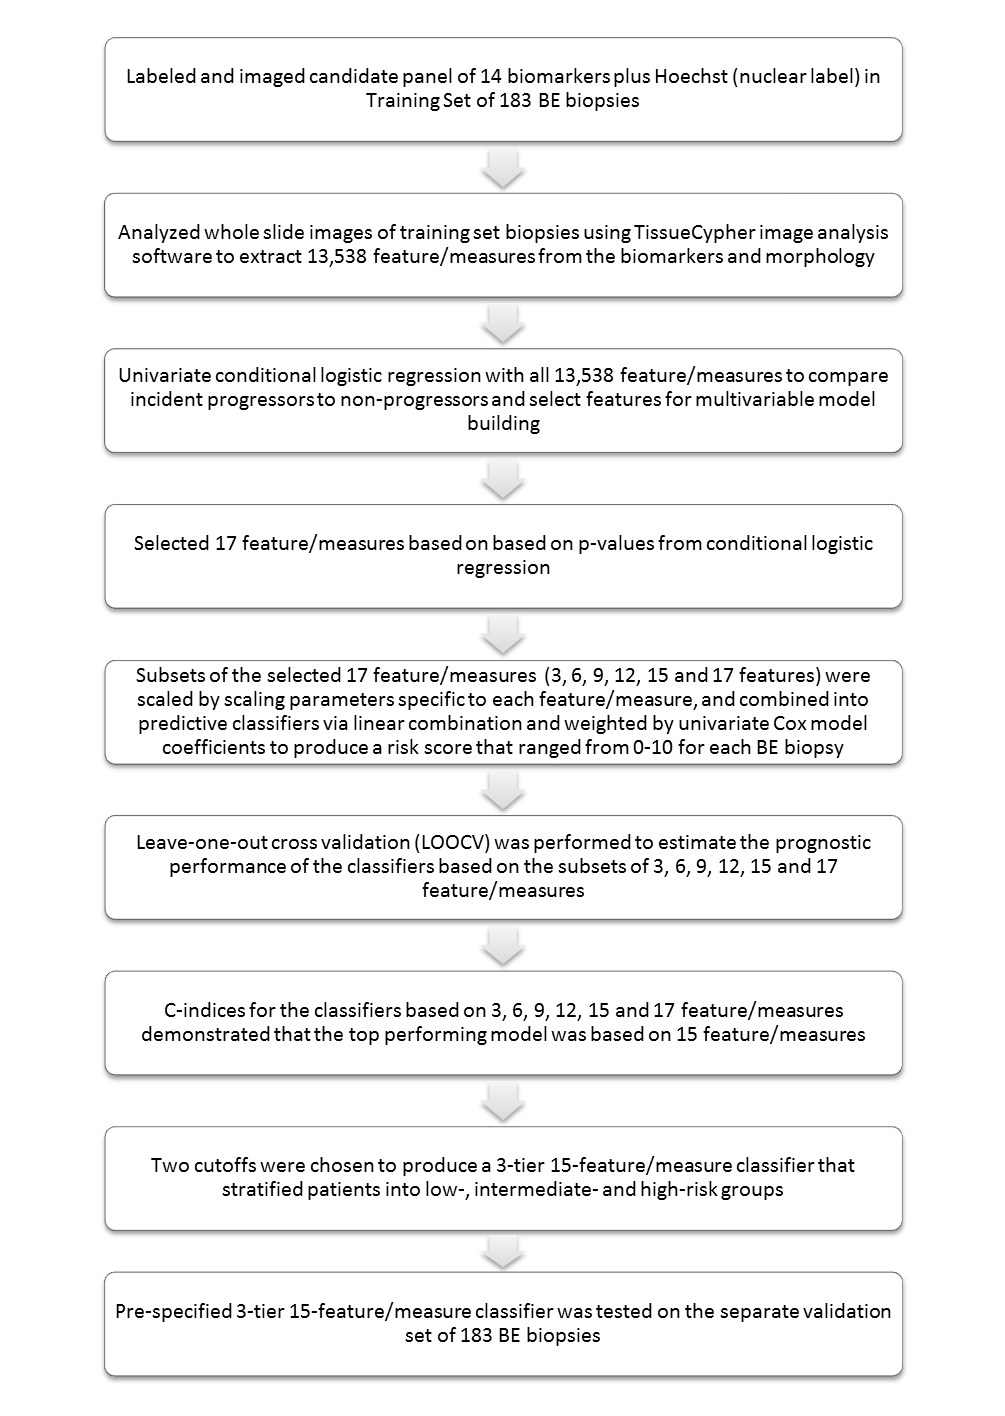
**

**
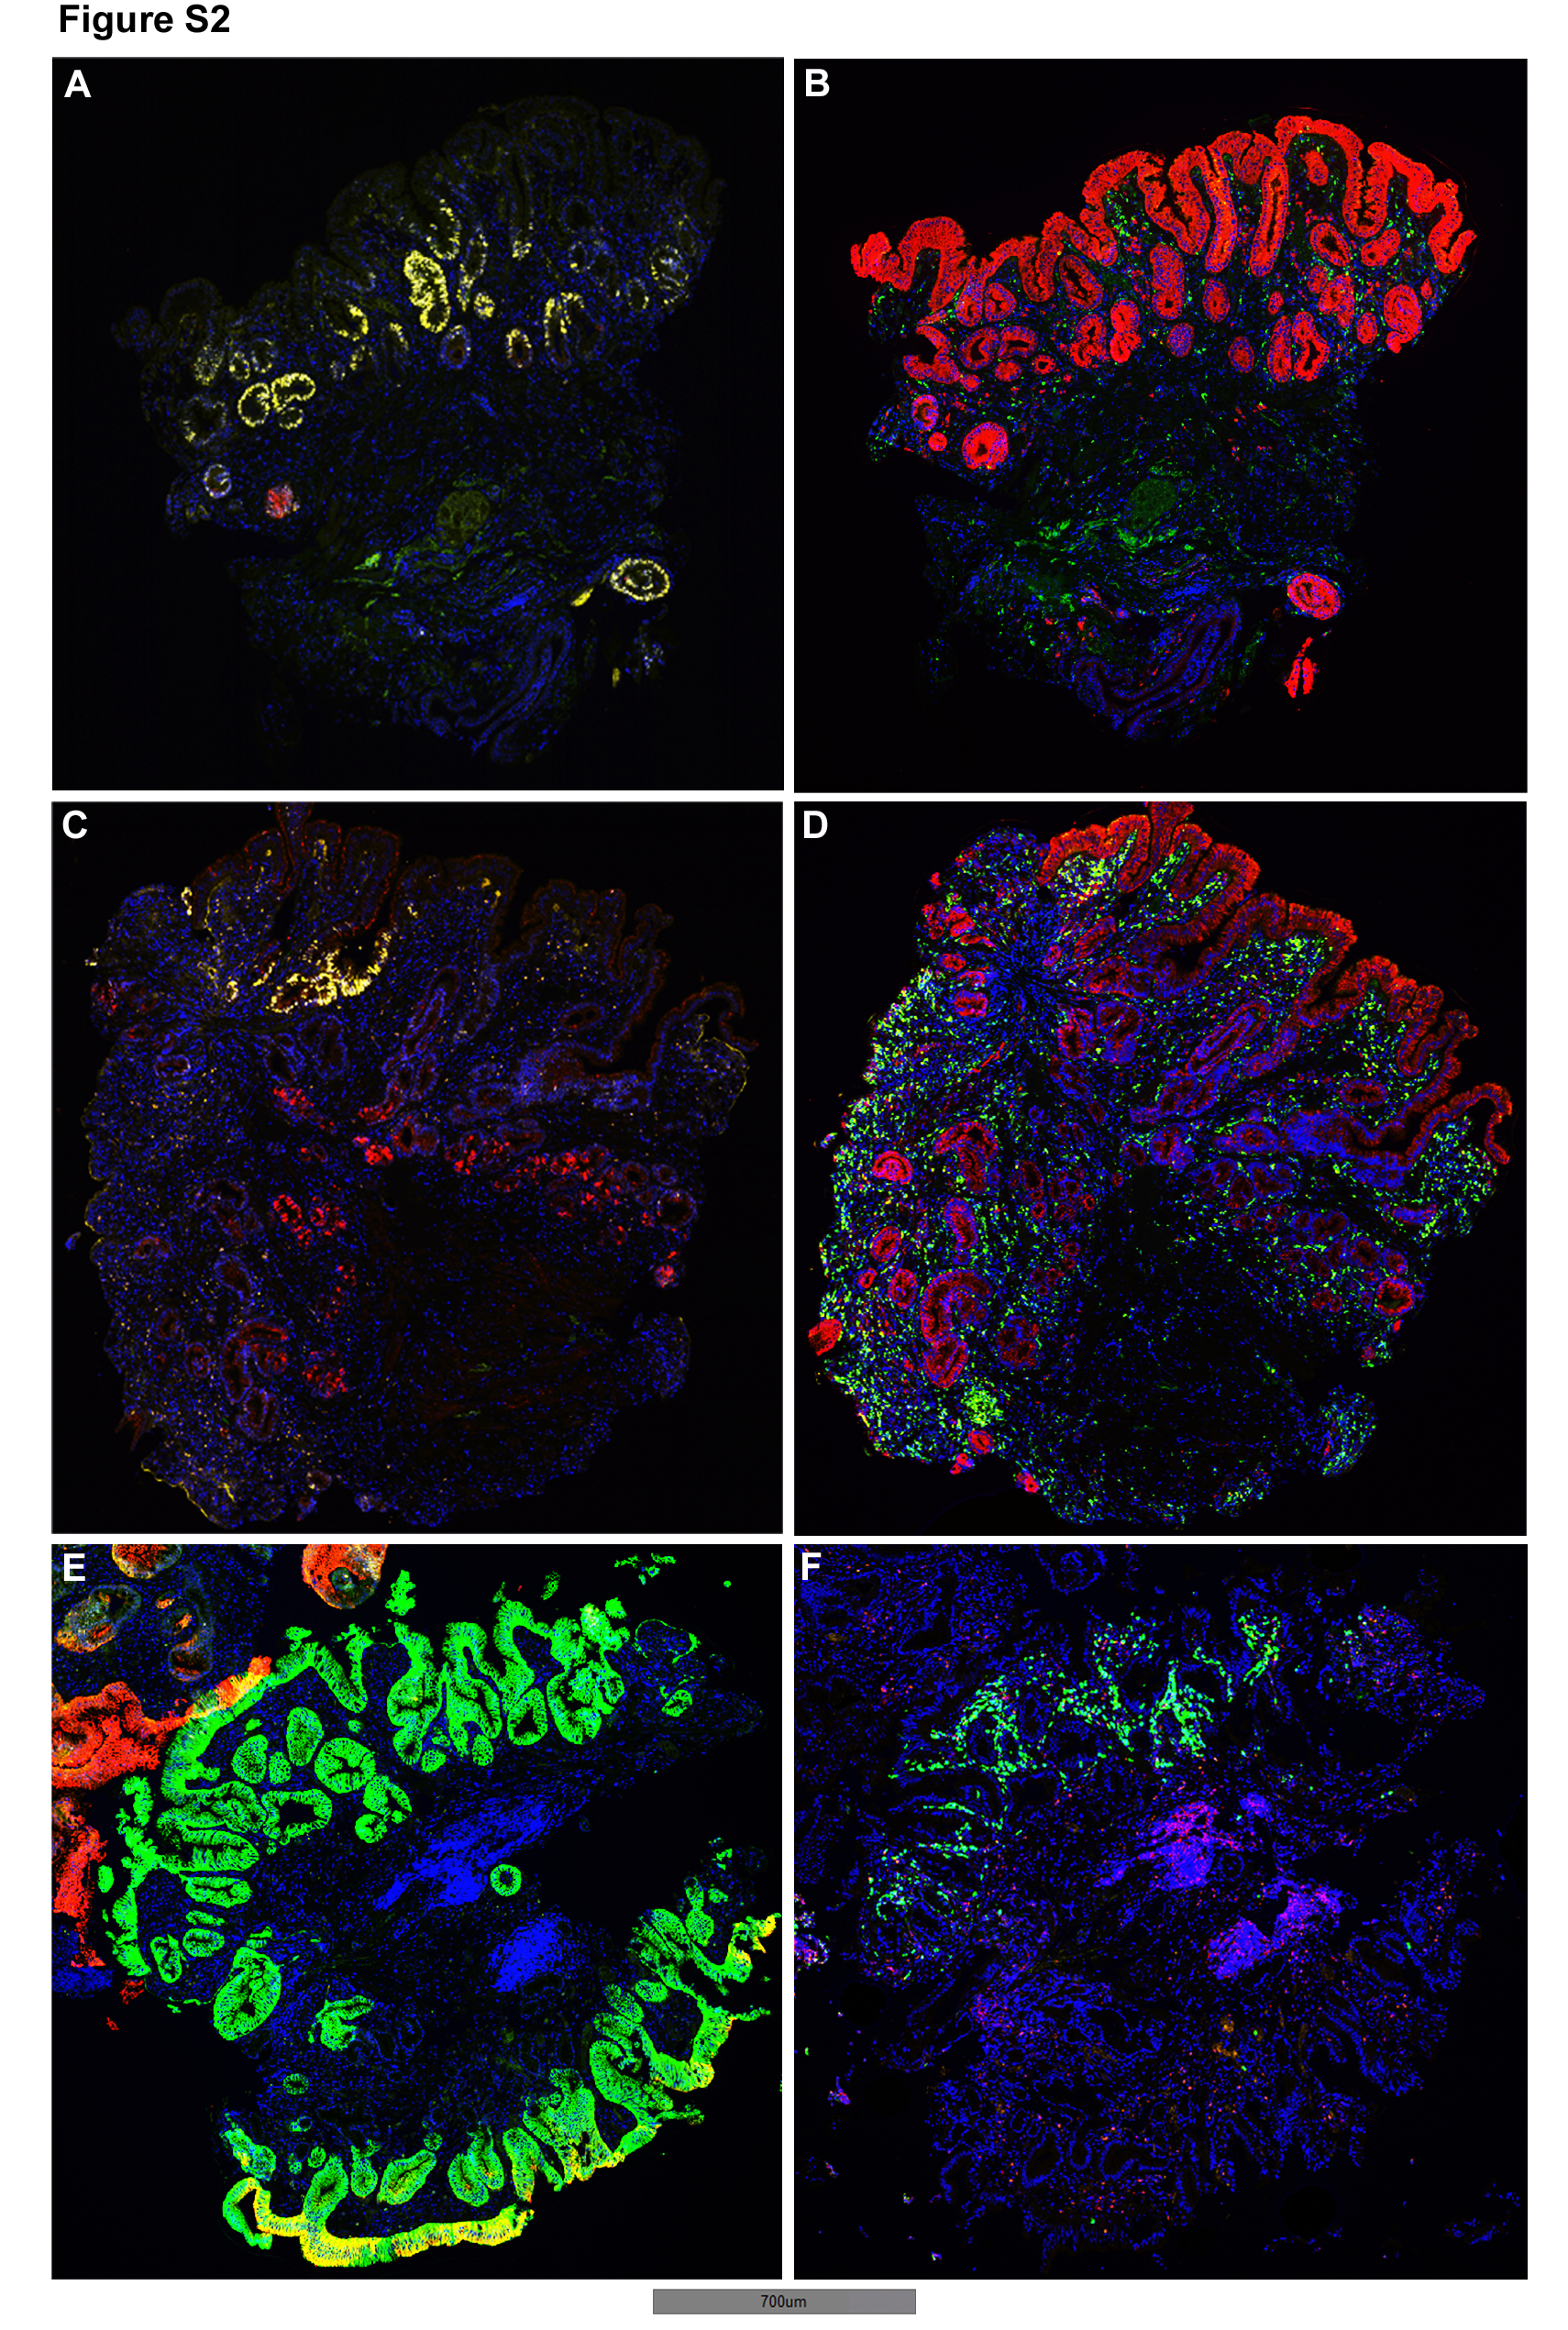
**

**Figure S2. Multiplexed Biomarker Labeling and Imaging in Incident Progressor BE Cases.** Representative images of the 9 candidate protein biomarkers from which the 15 features are derived from 2 ND biopsies (A-B and C-D) and 1 LGD biopsy (E-F) (pre-progression biopsies) from incident progressors. A: p53-yellow, AMACR-red, p16-green; B: CD68-green, COX-2-red; C: p53-yellow, AMACR-red, p16-green; D: CD68-green, COX-2-red; E: HER2/neu-green, K20-red; F: HIF-1-green, CD45RO-red. Hoechst shown in blue.

**Supplementary Methods**

**Additional Information on Sample Selection Methods:**

The cases selected for this study had collection dates 1997-2010 (Geisinger), 1998-2008 (University of Pittsburgh), 2006-2012 (University of Pennsylvania) and 1996-2011 (AMC). For patients with multiple biopsy levels taken at the same endoscopy, the biopsy with the highest diagnosis determined by a GI subspecialist pathologist was selected (low grade dysplasia was considered the highest diagnosis, followed by indefinite dysplasia, and non-dysplastic intestinal metaplasia was considered the lowest diagnosis). For patients with multiple biopsy levels with the same diagnosis, the pathologist at each institution selected a representative biopsy block with sufficient tissue for analysis. Segment length data was missing for 24 patients. Age and gender were complete for all patients. The original pathologic diagnosis extracted from the medical records was provided by a generalist pathologist for 304/366 patients and by a GI subspecialist pathologist for 62/366 patients. All cases were reviewed again by a GI subspecialist pathologist for this study. Biopsies prepared with Bouin’s fixative or methylene blue were excluded. Bouin’s fixative was used in the processing of Barrett’s esophagus biopsies at University of Pennsylvania prior to 2008 and is not compatible with the multiplexed immunofluorescence labeling and fluorescence imaging. Therefore, for the University of Pennsylvania patients, only biopsies taken from January 2008 onwards, which were fixed in formalin, were selected for this study. The other three clinical institutions providing samples for this study used standard formalin fixation for Barrett’s esophagus biopsies. Methylene blue was used at the University of Pittsburgh from 2011 onwards in the preparation of Barrett’s esophagus biopsy paraffin blocks. Methylene blue interferes with Hoechst labeling of nuclei and thus biopsies taken 2011 onwards at University of Pittsburgh were not included in this study. The other three clinical institutions providing samples for this study did not use methylene blue in the preparation of Barrett’s esophagus biopsy blocks.
